# Supplementary material for: Democratizing Public Health: Participatory Policymaking Institutions, Mosquito Control, and Zika in the Americas
Source: MDPI journal article supplement (doi:10.3390/tropicalmed8010038), 2023-01-05
Supplement: s1 [file s1]

Table S1: Negative Binomial Regression with Interactions between councils and FHP Coverage

| Municipal Zika Cases per<br>100,000 Residents |           |               |       |
|-----------------------------------------------|-----------|---------------|-------|
| Predictors                                    | Estimates | CI            | p     |
| (Intercept)                                   | 37.94     | 26.59 – 47.32 | <0.01 |
| Councils*FHP                                  | -7.21     | -7.04- -7.66  | <0.01 |
| Environmental<br>Sanitation Council           | -0.56     | -0.21 – -1.09 | 0.38  |
| FHP Coverage                                  | -0.10     | 0.19 – -0.63  | 0.22  |
| Local State Capacity                          | -0.87     | -0.66 – -1.17 | 0.04  |
| Mayoral Vote Share                            | -0.23     | 0.22 – -78    | 0.36  |
| Left Mayor                                    | 0.37      | 0.11 – 0.51   | 0.27  |
| Health Spending<br>(per capita, logged)       | -0.95     | -0.75 – -1.22 | <0.01 |
| Observations                                  | 5376      |               |       |
| Wald Chi <sup>2</sup> (6)                     | 231.67    |               |       |
| Prob> Chi <sup>2</sup>                        | 0.00      |               |       |
| R <sup>2</sup>                                | 0.38      |               |       |

Table S2 OLS Regression with Interactions between councils and FHP Coverage

| Municipal Zika Cases per<br>100,000 Residents |           |               |       |
|-----------------------------------------------|-----------|---------------|-------|
| Predictors                                    | Estimates | CI            | p     |
| (Intercept)                                   | 39.14     | 36.64 – 44.29 | <0.01 |
| Councils*FHP                                  | -6.93     | -6.51- -7.45  | <0.01 |
| Environmental<br>Sanitation Council           | -0.42     | -0.20 – -0.88 | 0.35  |
| FHP Coverage                                  | 0.21      | 0.02 – 0.43   | 0.41  |
| Local State Capacity                          | -0.90     | -0.64 – -1.14 | 0.02  |
| Mayoral Vote Share                            | -0.28     | 0.19 – -0.59  | 0.32  |
| Left Mayor                                    | 0.18      | 0.01 – 0.47   | 0.29  |
| Health Spending<br>(per capita, logged)       | -0.76     | -0.54 – -1.12 | <0.01 |
| Observations                                  | 5381      |               |       |
| Wald Chi <sup>2</sup> (6)                     | 224.85    |               |       |
| Prob> Chi <sup>2</sup>                        | 0.00      |               |       |
| R <sup>2</sup>                                | 0.40      |               |       |

Table S3 Negative Binomial Regression with Interactions between councils and local state capacity

| Municipal Zika Cases per<br>100,000 Residents |           |               |       |
|-----------------------------------------------|-----------|---------------|-------|
| Predictors                                    | Estimates | CI            | p     |
| (Intercept)                                   | 41.28     | 36.97 – 48.19 | <0.01 |
| Councils*Capacity                             | -8.14     | -7.92- -8.39  | <0.01 |
| Environmental<br>Sanitation Council           | -0.22     | -0.03 – -0.52 | 0.34  |
| FHP Coverage                                  | -0.66     | -0.27 – -0.85 | 0.03  |
| Local State Capacity                          | -0.05     | 0.12 – -0.19  | 0.20  |
| Mayoral Vote Share                            | -0.26     | 0.18 – -56    | 0.31  |
| Left Mayor                                    | 0.35      | 0.10 – 0.54   | 0.28  |
| Health Spending<br>(per capita, logged)       | -0.93     | -0.74 – -1.22 | <0.01 |
| Observations                                  | 5365      |               |       |
| Wald Chi <sup>2</sup> (6)                     | 244.92    |               |       |
| Prob> Chi <sup>2</sup>                        | 0.00      |               |       |
| R <sup>2</sup>                                | 0.36      |               |       |

Table S4 OLS Regression with Interactions between councils and local state capacity

| Municipal Zika Cases per<br>100,000 Residents |           |               |       |
|-----------------------------------------------|-----------|---------------|-------|
| Predictors                                    | Estimates | CI            | p     |
| (Intercept)                                   | 38.20     | 34.17 – 46.60 | <0.01 |
| Councils*Capacity                             | -7.99     | -7.64 - 8.25  | <0.01 |
| Environmental<br>Sanitation Council           | -0.18     | -0.03 – -0.36 | 0.39  |
| FHP Coverage                                  | 0.71      | 0.42 – 0.93   | 0.38  |
| Local State Capacity                          | -0.11     | 0.16 – -0.40  | 0.31  |
| Mayoral Vote Share                            | -0.30     | -0.05 – -0.57 | 0.28  |
| Left Mayor                                    | 0.15      | 0.03 – 0.39   | 0.18  |
| Health Spending<br>(per capita, logged)       | -0.80     | -0.68 – -0.92 | <0.01 |
| Observations                                  | 5370      |               |       |
| Wald Chi <sup>2</sup> (6)                     | 218.67    |               |       |
| Prob> Chi <sup>2</sup>                        | 0.00      |               |       |
| R <sup>2</sup>                                | 0.39      |               |       |

Table S5 Negative Binomial Regression with Interactions between councils and health spending

| Municipal Zika Cases per<br>100,000 Residents |           |               |       |
|-----------------------------------------------|-----------|---------------|-------|
| Predictors                                    | Estimates | CI            | p     |
| (Intercept)                                   | 36.55     | 33.29 – 42.34 | <0.01 |
| Councils*Spending                             | -7.64     | -7.14- -8.10  | <0.01 |
| Environmental<br>Sanitation Council           | -0.29     | -0.01 – -0.62 | 0.40  |
| FHP Coverage                                  | -0.86     | -0.19 – -0.94 | 0.01  |
| Local State Capacity                          | -0.85     | 0.21 – -1.45  | 0.33  |
| Mayoral Vote Share                            | -0.26     | 0.18 – -56    | 0.31  |
| Left Mayor                                    | 0.14      | 0.01 – 0.31   | 0.18  |
| Health Spending<br>(per capita, logged)       | -0.11     | 0.23 – -0.44  | 0.16  |
| Observations                                  | 5379      |               |       |
| Wald Chi <sup>2</sup> (6)                     | 248.15    |               |       |
| Prob> Chi <sup>2</sup>                        | 0.00      |               |       |
| R <sup>2</sup>                                | 0.43      |               |       |

Table S6 OLS Regression with Interactions between councils and health spending

| Municipal Zika Cases per<br>100,000 Residents |           |               |       |
|-----------------------------------------------|-----------|---------------|-------|
| Predictors                                    | Estimates | CI            | p     |
| (Intercept)                                   | 36.15     | 32.93 – 41.50 | <0.01 |
| Councils*Spending                             | -7.63     | -7.10- -8.03  | <0.01 |
| Environmental<br>Sanitation Council           | -0.25     | -0.06 – -0.47 | 0.31  |
| FHP Coverage                                  | -0.74     | -0.52 – -0.91 | <0.01 |
| Local State Capacity                          | -0.49     | -0.13 – -0.61 | 0.04  |
| Mayoral Vote Share                            | -0.30     | -0.05 – -0.57 | 0.28  |
| Left Mayor                                    | -0.22     | -0.06 – -0.43 | 0.19  |
| Health Spending<br>(per capita, logged)       | -0.09     | 0.27 – -0.35  | 0.26  |
| Observations                                  | 5371      |               |       |
| Wald Chi <sup>2</sup> (6)                     | 223.52    |               |       |
| Prob> Chi <sup>2</sup>                        | 0.00      |               |       |
| R <sup>2</sup>                                | 0.40      |               |       |
